# Supplementary material for: Phytochemical and antioxidant analysis of medicinal and food plants towards bioactive food and pharmaceutical resources
Source: PubMed Central journal article supplement (PMC8113553; doi:10.1038/s41598-021-89437-4), 2021-05-11
Supplement: 41598_2021_89437_MOESM1_ESM.pdf [file 41598_2021_89437_MOESM1_ESM.pdf]

## **Additional information**

### **Abbreviation**

ABTS<sup>•+</sup>: 2,2'-azino-bis (3-ethylbenzothiazoline-6-sulfonic acid) diammonium salt

CATE: catechin equivalents

DPPH<sup>•</sup>: 2,2-diphenyl-1-picrylhydrazyl radical

DW: dry weight

ECE: epicatechin equivalents

GAE: gallic acid equivalents

mM: m mol, millimole

RT: room temperature

TPTZ: 2,4,6-tris(2-pyridyl)-s-triazine

Trolox: (±)-6-hydroxy-2,5,7,8-tetramethylchromone-2-carboxylic acid
